# Supplementary material for: Prognostic role of pretreatment neutrophil to lymphocyte ratio in breast cancer patients: A meta-analysis
Source: PubMed Central journal article supplement — Medicine (Baltimore). 2017 Nov 10;96(45):e8101. doi: 10.1097/MD.0000000000008101 (PMC5690700; doi:10.1097/md.0000000000008101), 2017-11-10

## Supplemental Figure Legend

SFigure 1 Forrest plot for overall survival after the four studies that included single subtypes of breast cancer patients were all deleted

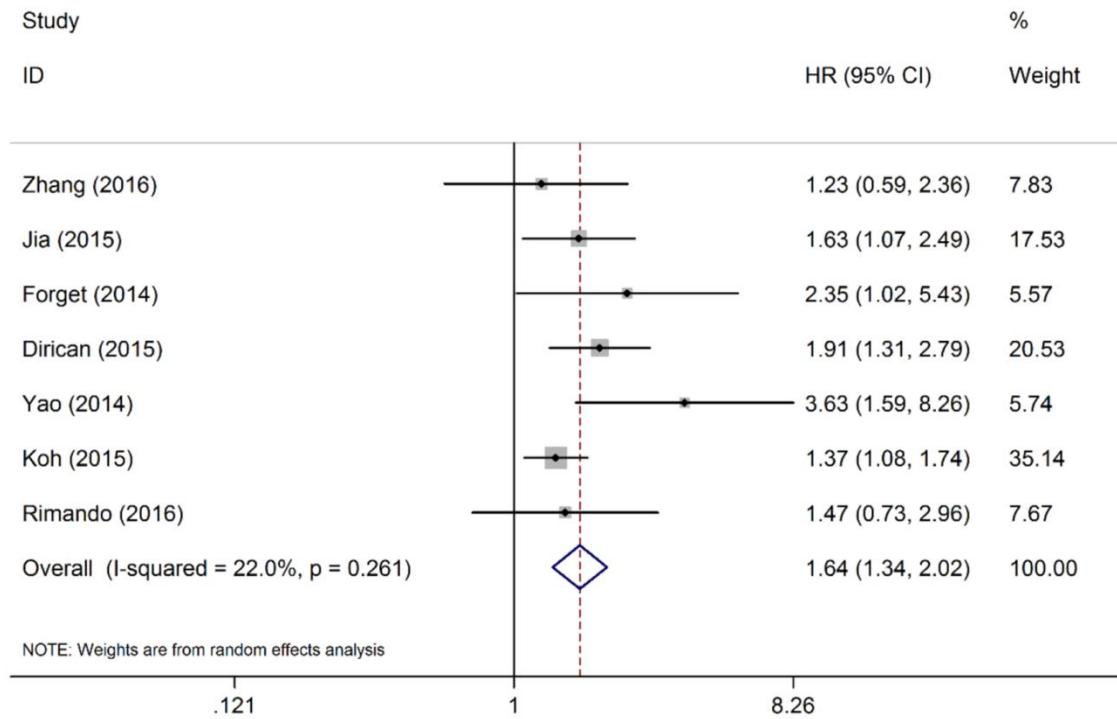

Figure 2 subgroup analysis of disease-free survival with the deletion of Supp1 study: (A) categories according to ethnicity; (B) categories according to patients number

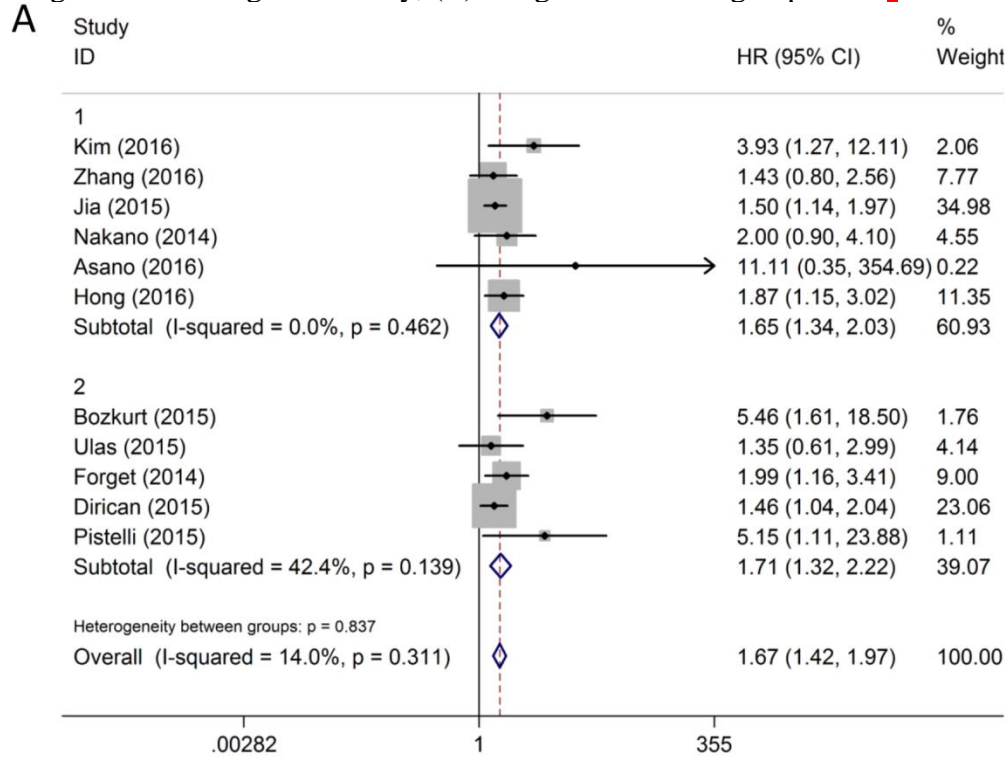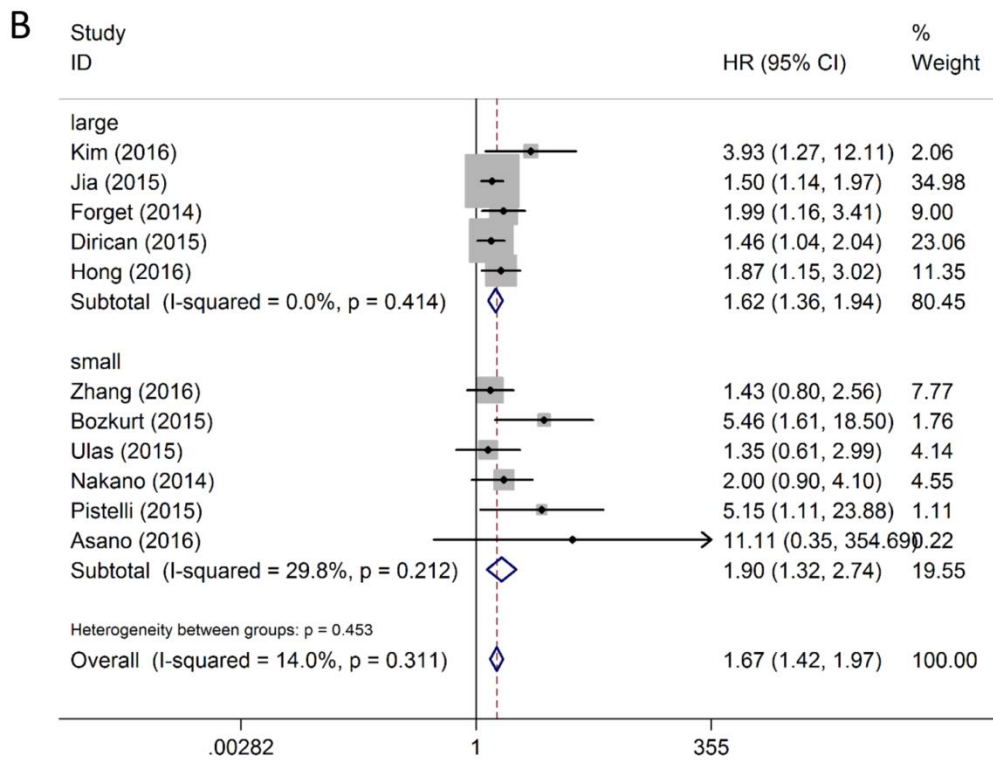

SFigure 3 sensitivity analysis of each study: (A) for disease-free survival, (B) for overall survival; (C) for cancer-specific survival

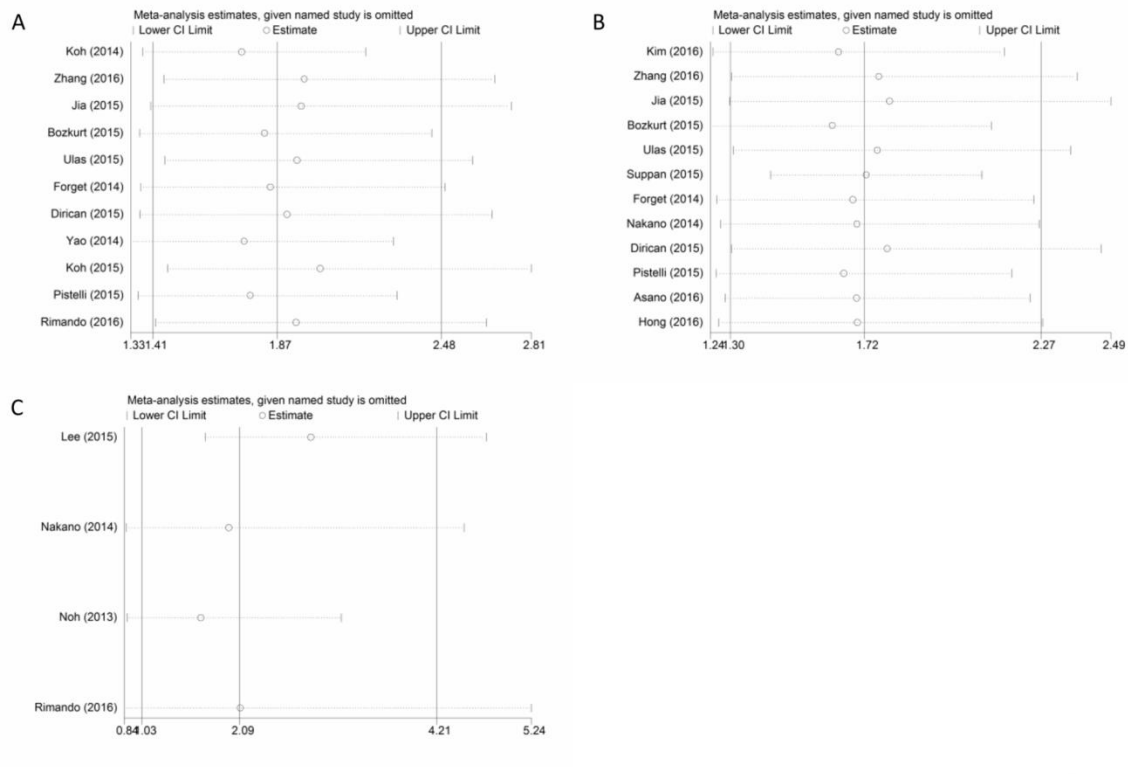

Figure 4 publication bias estimated by Egger's method: (A) for disease-free survival; (B) for overall survival

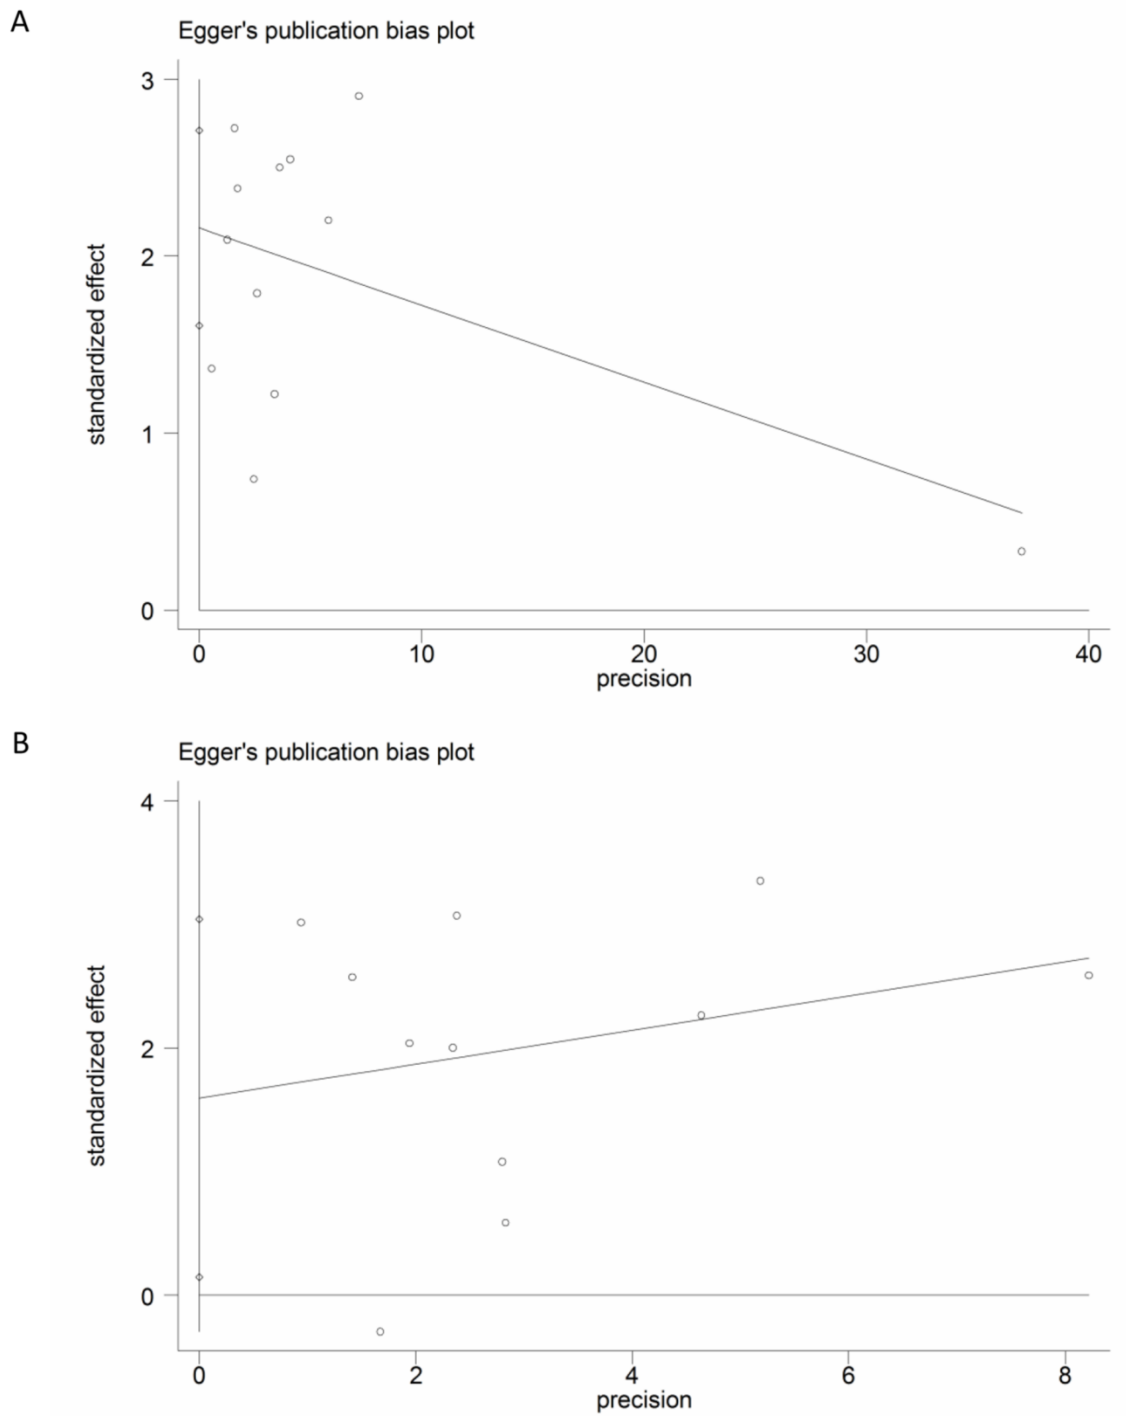

Supplement: medi-96-e8101-s001.pdf [file medi-96-e8101-s001.pdf]
